# Supplementary material for: Roles of cytosolic phospholipase A2α in reproductive and systemic toxicities in 2,3,7,8-tetrachlorodibenzo-p-dioxin-exposed mice
Source: PubMed Central journal article supplement (PMC5818604; doi:10.1007/s00204-017-2081-z), 2017-10-17
Supplement: 204_2017_2081_MOESM1_ESM.pdf [file 204_2017_2081_MOESM1_ESM.pdf]

## Roles of Cytosolic Phospholipase A2 $\alpha$ in Reproductive and Systemic Toxicities in 2,3,7,8-Tetrachlorodibenzo-*p*-dioxin Exposed Mice

Nozomi Fujisawa, Wataru Yoshioka<sup>\*2</sup>, Hiroyuki Yanagisawa, and Chiharu Tohyama<sup>\*1</sup>

\*To whom correspondence should be addressed.

1. E-mail: tohyamac-ky@umin.org

2. E-mail: yoshioka-w@umin.ac.jp

**Supplementary Table 1.** Sequences of primers used for qPCR

| Target Gene                                |         | Primer Sequences (5' to 3')     |
|--------------------------------------------|---------|---------------------------------|
| <i>AHRR</i>                                | Forward | CAG GGC AGA CAT TGT GGT TA      |
|                                            | Reverse | CTC CAT TGC TCT TTC CTG CT      |
| <i>COX-2</i>                               | Forward | TGT GAA CAA TCA AAC AAA ATG ATG |
|                                            | Reverse | GCG TAA ATT CCA ACA GCC TAA GT  |
| <i>cPLA<sub>2</sub><math>\alpha</math></i> | Forward | AGC ATT CAA AAG GCT TCA CG      |
|                                            | Reverse | GGG AAA CAG AGC AAC GAG AT      |
| <i>Cyclophilin B</i>                       | Forward | GAC TTC ACC AGG GGA GAT GG      |
|                                            | Reverse | TGT GAG CCA TTG GTG TCT TTG     |
| <i>CYP1A1</i>                              | Forward | GGC ACC TCT GTT CAC CCT A       |
|                                            | Reverse | GAA TCT CTC CCT CTG TTC TTG     |
| <i>CYP1B1</i>                              | Forward | TGC CTG CCA CTA TTA CGG AC      |
|                                            | Reverse | GGT CCC TCC CCA CAA CCT         |
| <i>F4/80</i>                               | Forward | TGC ATC TAG CAA TGG ACA GC      |
|                                            | Reverse | GCC TTC TGG ATC CAT TTG AA      |
| <i>IL-1<math>\beta</math></i>              | Forward | CAA GGA GAA CCA AGC AAC GA      |
|                                            | Reverse | GCC GTC TTT CAT TAC ACA GGA     |
| <i>mPGES-1</i>                             | Forward | CTC AAG CCC TGC TAC CAC A       |
|                                            | Reverse | GGC CTC AGA CAA GAG ACC AT      |
| <i>miR-101a</i>                            | Forward | GCC TAC AGT AGT GTG ATA AC      |
| <i>Nqo1</i>                                | Forward | AGA CCT TGC TTT CTA TCA CCA CT  |
|                                            | Reverse | AGA CCT GGA AGC CAC AGA AAC     |
| <i>TNF-<math>\alpha</math></i>             | Forward | CAC CAC CAT CAA GCA CTC AA      |
|                                            | Reverse | GAC AGA GGC AAC CTG ACC AC      |
| <i>U6 snRNA</i>                            | Forward | CGC TTC GGC AGC ACA TAT ACT AA  |

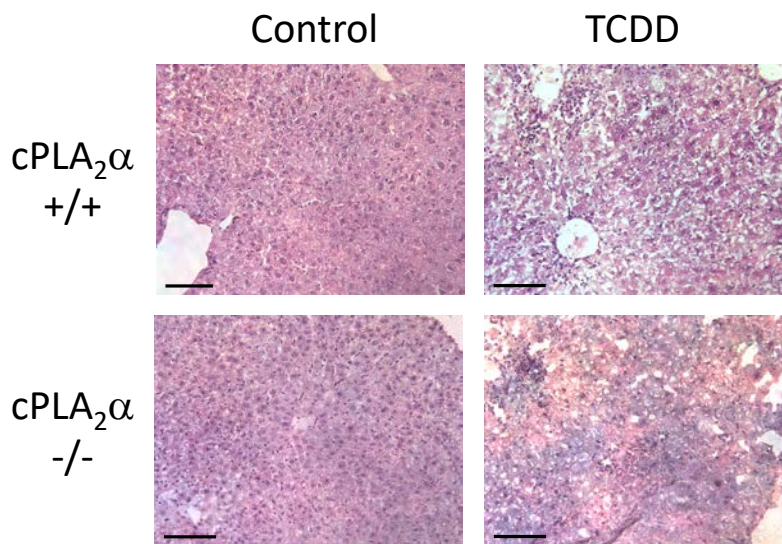

**Supplementary Figure 1.** Representative photographs of hematoxylin and eosin staining of livers of adult male mice; Bar = 100  $\mu$ m. cPLA<sub>2</sub>α<sup>+/+</sup> and <sup>-/-</sup> mice were intraperitoneally injected TCDD at a dose of 0 (Control) or 50  $\mu$ g/kg body weight on Day 0, and the livers were analyzed on Day 10.

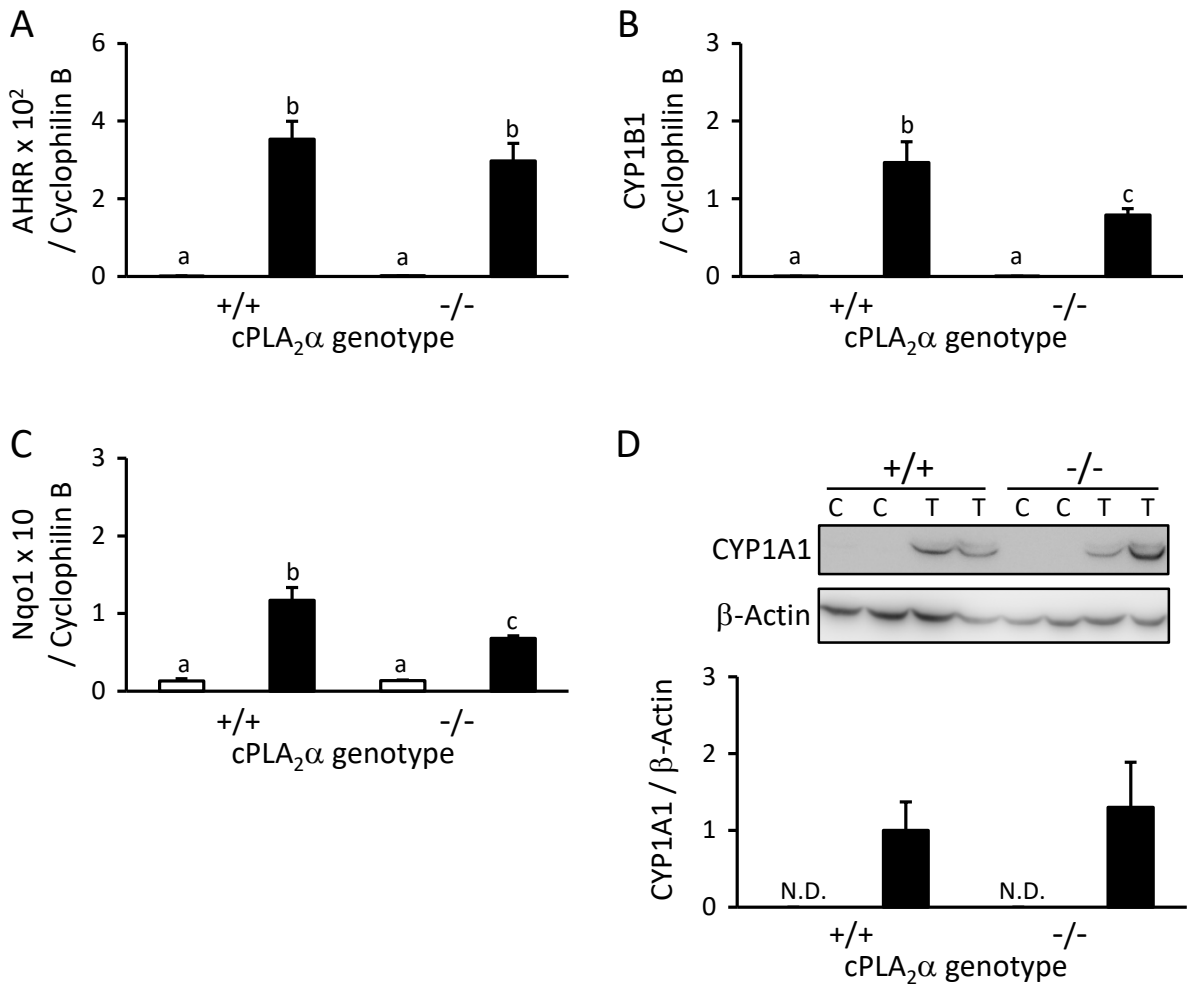

**Supplementary Figure 2.** AHRR (A), CYP1B1 (B), and Nqo1 (C) mRNA expression, and CYP1A1 protein expression (D) in livers of cPLA<sub>2</sub>α<sup>+/+</sup> and cPLA<sub>2</sub>α<sup>-/-</sup> adult male mice at 8 days post administration of TCDD (50 μg/kg body weight) or vehicle. Black and open histogram indicate TCDD and vehicle treatment, respectively. Bars indicate means ± SEM (n = 4). N.D.: not detected. Histograms with different letters indicate significant differences by Tukey post hoc test (A-C) and Welch's *t*-test (D).
